# Supplementary material
Source: PubMed Central journal article supplement (PMC2630409)
Supplement: NIHMS86612-supplement-1_si_001.pdf [file NIHMS86612-supplement-1_si_001.pdf]

Supporting Information for

A. I. Nash, W-H. Ko, S. M. Harper, K. M. Gardner

A Conserved Glutamine Plays a Central Role in LOV Domain Signal Transmission and Duration

**Supporting Materials and Methods:**

**Obtaining Absorption coefficients for wildtype *AsLOV2*, Q513N, and Q513L**

To obtain absorption coefficients we employed trichloroacetic acid (TCA) precipitation of our proteins to isolate FMN (*I*). Following addition of 10% TCA, each protein sample was incubated in the dark at room temperature 5 min., then centrifuged at 20,000 x g, 4°C for 10 min. to clarify supernatant. An FMN standard curve was prepared using the  $A_{446}$  measurements of FMN at concentrations of 1  $\mu$ M, 10  $\mu$ M, 50  $\mu$ M, 100  $\mu$ M, and 250  $\mu$ M in 50 mM sodium phosphate, 100 mM NaCl, pH 6.0 with 10% TCA. The UV-visible absorbance spectrum of each sample's supernatant was recorded and the concentrations of FMN determined using the standard curve. Assuming a 1:1 protein/FMN stoichiometry, we assume the concentration of FMN is equal to total concentration of protein and calculate an absorption coefficient for each protein using the following formula:

$$\epsilon_{446,TCA} = A_{446,TCA} / [C_{TCA} * 1 \text{ nm}]$$

Where  $\epsilon$  is the absorption coefficient, A is the absorption, and C is the concentration of total protein.

To convert the  $\epsilon_{446,TCA}$  to the an  $\epsilon_{446}$  under non-acidic buffer conditions, we measured the ratio between the  $A_{446}$  measured under non-acidic versus acidic conditions ( $A_{446,non-$

acidic/ $A_{446,TCA}$ ) and multiplied the  $\epsilon_{446,TCA}$  by this ratio. The resulting absorption coefficient ( $\epsilon_{446}$ ) for wildtype *AsLOV2*, Q513N, and Q513L are reported in Table 1.

### **Supporting Figure Legends**

**Supporting Figure 1. Overlay of dark (black) and lit (red) state  $^{15}\text{N}/^1\text{H}$  HSQC correlation spectra for (a) wildtype *AsLOV2* domain, (b) Q513L, and (c) Q513N.**

Spectra were recorded at 25°C at 500 MHz. Black spectra represent the dark state and red spectra represent the lit state. See materials and methods for more details. Mutations lead to chemical shift changes as well as differential broadening across each spectrum.

**Supporting Figure 2. UV-visible absorbance spectra of wildtype, Q513L and Q513N mutants.** UV-visible absorbance spectra shown here were recorded from 250nm to 550 nm for each protein at concentrations between 50  $\mu\text{M}$  and 70  $\mu\text{M}$  in buffer containing 50 mM sodium phosphate (pH 6.0) and 100 mM NaCl. Calculated  $A_{280}/A_{446}$  ratios are 2.60 for wildtype, 2.63 for Q513N and 2.76 for Q513L (Q513L ratio taken at  $A_{438}$  due to blue shift).

**Supporting Figure 3. Sequence alignment of known LOV domains.** Sequence alignments of 128 known LOV domains are shown with the predicted secondary structure indicated on the top of the sequences. Residues Q513 and F494 are indicated on the bottom. Red boxes with white characters indicate strict identity. Red characters or bold black characters indicate similarity within a group, while yellow boxes indicate similarity across groups.

Reference:

1. Christie, J. M., Salomon, M., Nozue, K., Wada, M., and Briggs, W. R. (1999)  
LOV (light, oxygen, or voltage) domains of the blue-light photoreceptor  
phototropin (nph1): binding sites for the chromophore flavin mononucleotide,  
*Proc Natl Acad Sci U S A* 96, 8779-8783.

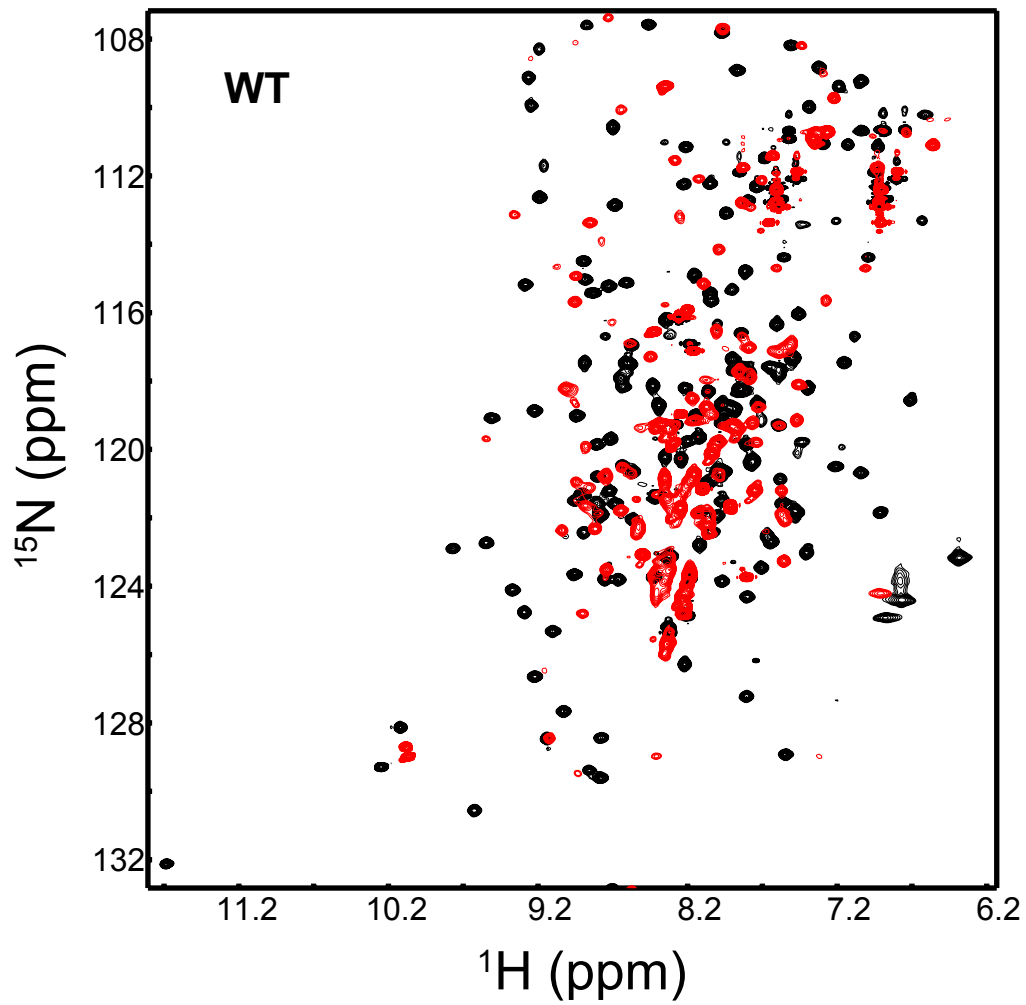

Supporting Fig. 1a  
Nash *et al.*

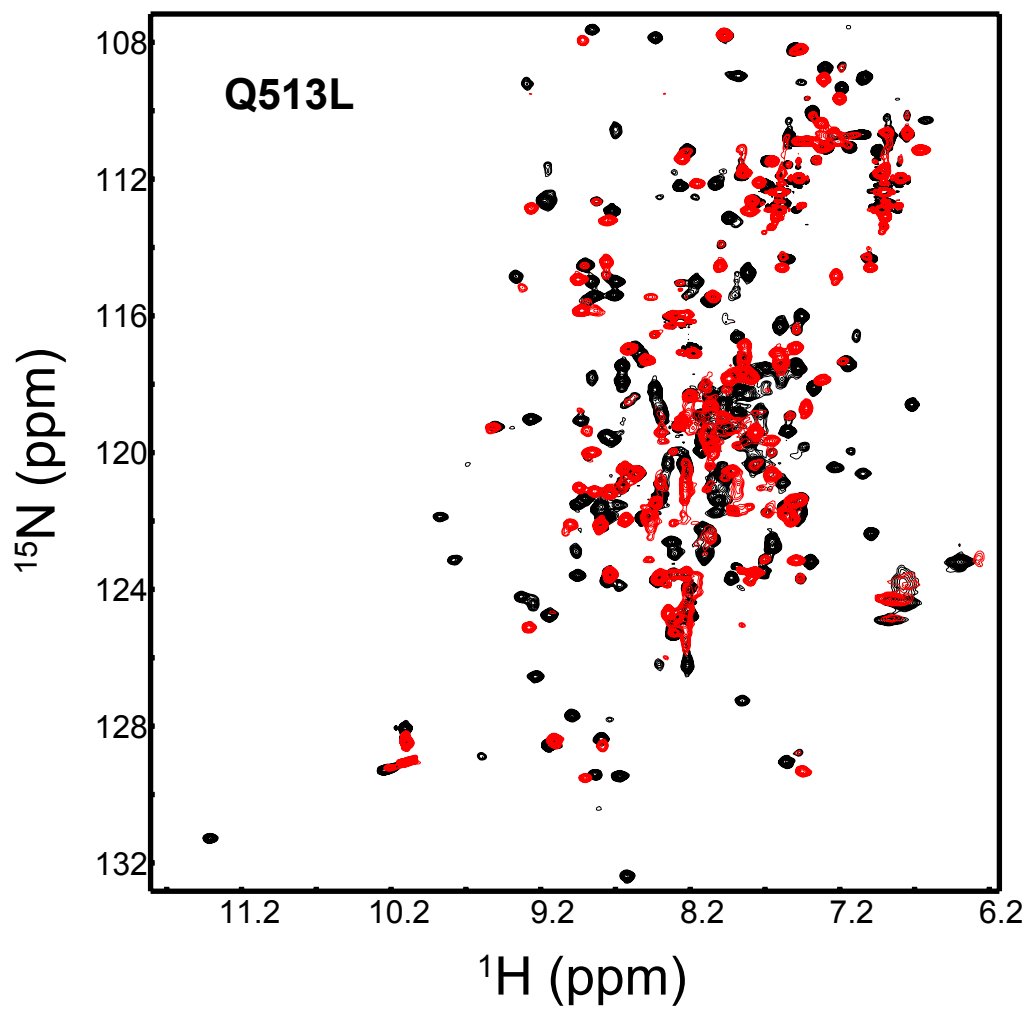

Supporting Fig. 1b  
Nash *et al.*

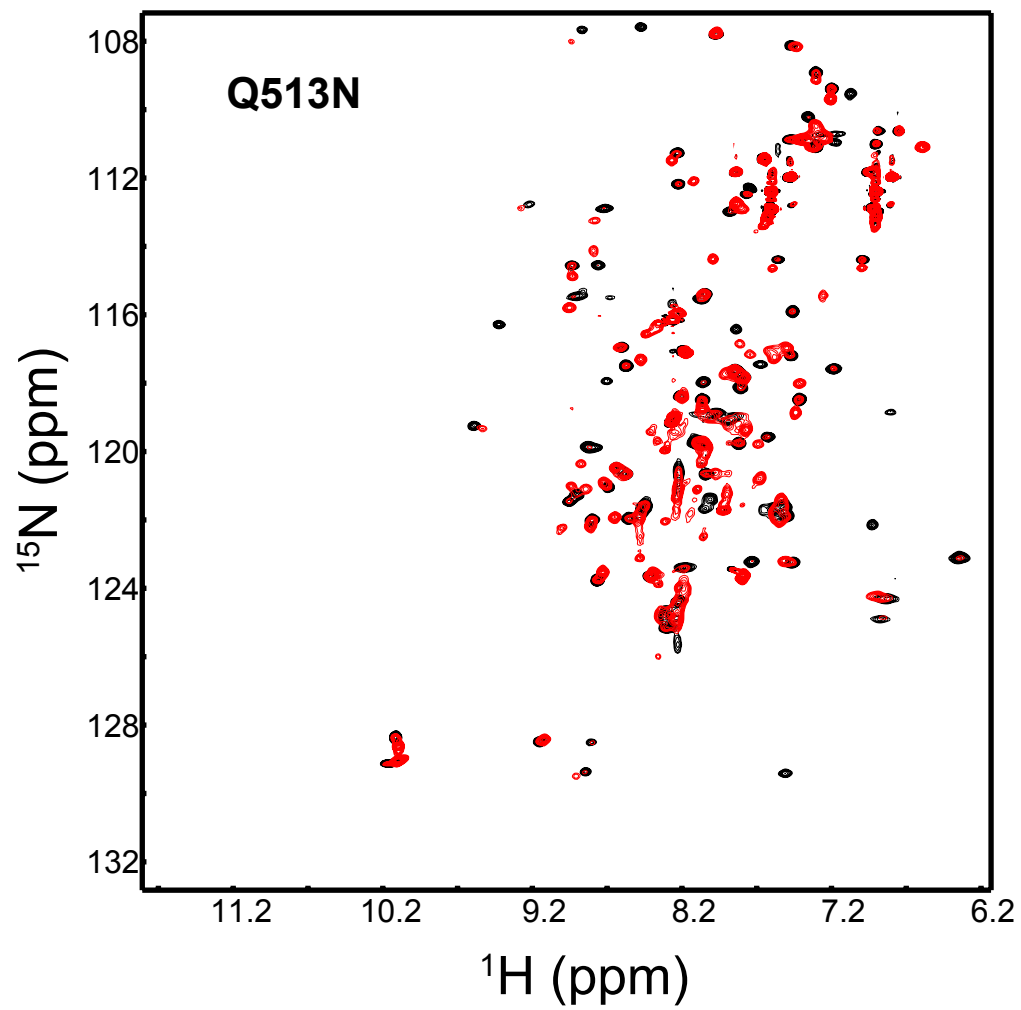

Supporting Fig. 1c  
Nash *et al.*

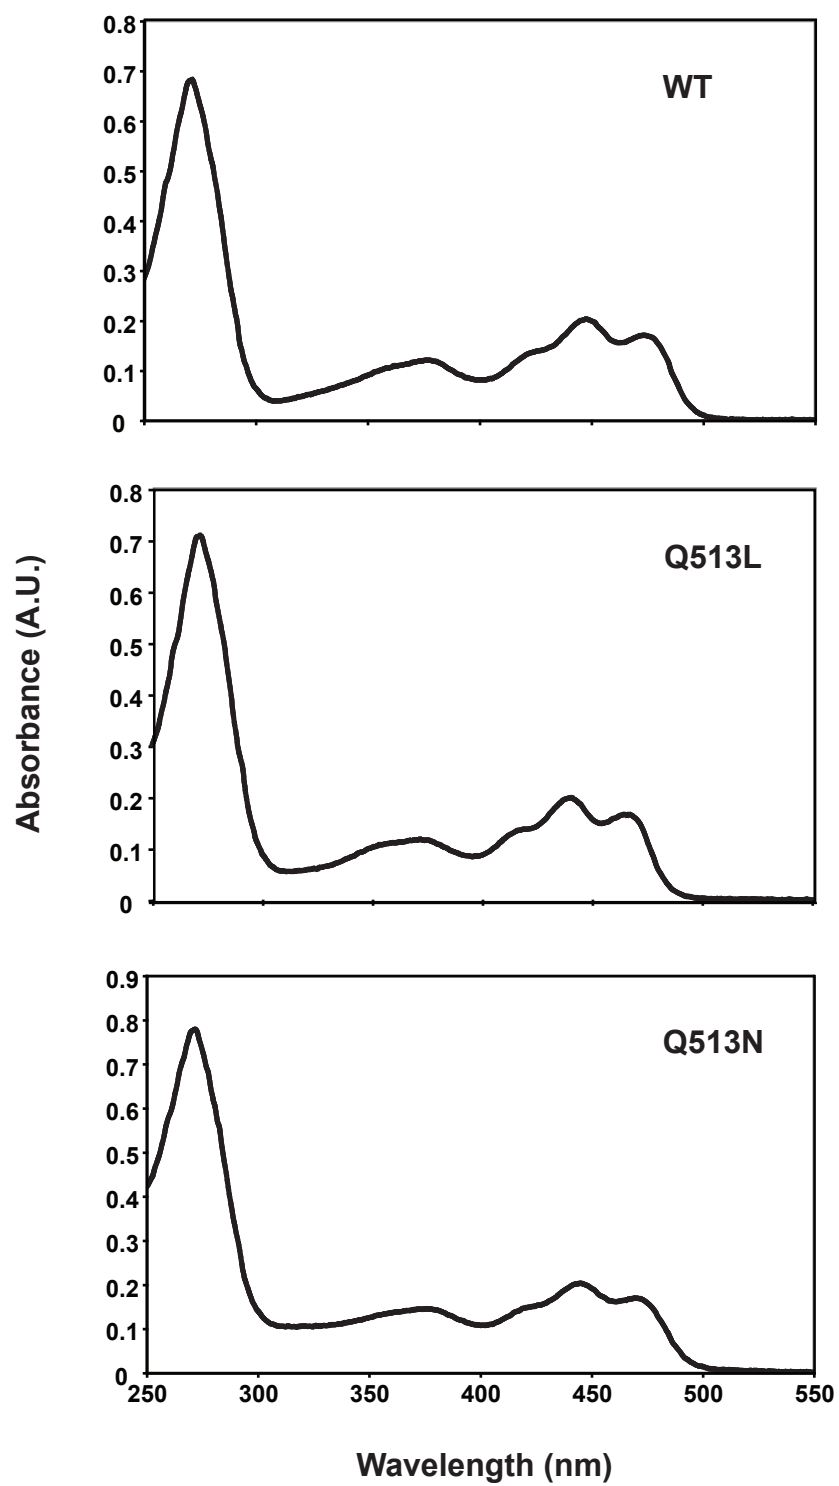

Supporting Fig. 2  
Nash *et al.*

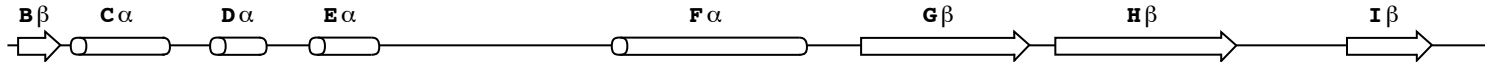

|                       |                                                                                                                                                                                                                       |
|-----------------------|-----------------------------------------------------------------------------------------------------------------------------------------------------------------------------------------------------------------------|
| Q64HK3_TRIAT/343-466  | I I Y V S D N F Q N L T G Y S R H E I I G O N C R F F O A P D G K V E A G S K R E F V D D G A V F N L K R M I K . E G R . E V Q Q S L I N Y . . . R K G G K P F L N L L T M I P I P W D T . D E I R Y F I G F Q I D L |
| Q5PXG9_TRIRE/363-486  | I I Y V S D N F Q N L T G Y S R H E I M G O N C R F F O A P D G K V E A G S K R E F V D D G A V N L K R M I Q . E G R . E V Q Q S L I N Y . . . R K G G K P F L N L L T M I P I P W D T . D E I R Y F I G F Q I D L   |
| Q4I4B7_GIBZE/349-477  | I I Y V S D N F Q N L T G Y S R H E I V G O N C R F F O A P D G K V E A G S K R E F V D D G A V N L K R M I V H . E G R . E V Q Q S L I N Y . . . R K G G K P F L N L L T M I P I P W D T . D E I R Y F I G F Q I D L |
| Q4ICR7_GIBZE/301-390  | I M L A S D F E E L T G Y S R T E V L A H N C R F F L O G P Q . . . . . T D R D I A N M S R A I V . R N D . E C T E L L N F . . . R K D G T P F F W N L L F L C P L L D K T . G K T F K F M G A Q I D V               |
| Q6BCU0_Q7NPM2/581-670 | I I F A S D E F L E L T E Y T R E E V L G R N C R F L O G P D . . . . . T D R T V Q Q I R D A I K . E N R . D I T V Q L L N Y . . . T K S G K P F W N L F H L Q A M R D Q R . G E L Q Y F I G V L D G                 |
| Q6BCU1_PHYPA/544-633  | I I F A S D E F L E L T E Y T R E E I L G R N C R F L O G P D . . . . . T D Q N T V Q K I R D A I K . E N R . D I T V Q L L N Y . . . T K S G K P F W N L F H L Q A M R D H K . G E L Q Y F I G V Q M D G             |
| Q6BCT7_PHYPA/653-742  | I I F A S D E F L E L T E Y T R E E I L G R N C R F L O G P D . . . . . T D R A V V D Q I R D A I A . A R R . D I T V Q L L N Y . . . T K S G K P F W N L F H L Q A M R D H N . G E L Q Y F I G V L D G               |
| Q6BCT8_PHYPA/619-708  | I I F A S D E F L E L T E Y T R E E I L G R N C R F L O G P D . . . . . T D L A V V D Q I R D A I A . A R R . D I T V Q L L N Y . . . T K S G K P F W N L F H L Q A M R D H D . G E L Q Y F I G V L D G               |
| Q401Q4_MOUSE/253-367  | I I F A S D D F L E L T E Y S R E E V I G R N C R F L O G P D . . . . . T D Q D T V Q K I R D A I R . D C R . D V T V Q L L N Y . . . T K S G K P F W N M F H L Q A V K N S K . G E L Q Y F I G V L D A               |
| Q401Q5_MOUSE/304-396  | I I F A S D D F L E L T E Y T R E E I I G R N C R F L O G K D . . . . . T D K E T V A K I R H A I D . N H Q . D I T V Q L L N Y . . . T K S G K P F W N L F H L Q A V R D T K . G R L Q Y F I G V L D A               |
| Q5DW42_PHAVU/487-576  | I I F A S D S F L E L T E Y T R E E I L G R N C R F L O G P E . . . . . T D Q A T V S R I R D A I R . E Q R . E I T V Q L I N Y . . . T K S G K K F W N L F H L Q P M R D Q K . G E L Q Y F I G V L D G               |
| PHOT2_ARATH/403-492   | I I F A S D S F L E L T E Y S R E E I L G R N C R F L O G P E . . . . . T D Q A T V Q K I R D A I R . D Q R . E I T V Q L I N Y . . . T K S G K K F W N L F H L Q P M R D Q K . G E L Q Y F I G V L D G               |
| Q9ST27_ORYSA/402-491  | I I F A S D S F L E L T E Y T R E E I L G R N C R F L O G P E . . . . . T D Q G T V D K I R E A I R . E Q K . E I T V Q L I N Y . . . T K S G K K F W N L F H L Q P M R D Q K . G E L Q Y F I G V L D G               |
| Q41384_SPIOL/217-306  | I I F A S D S F L E L T E Y T R E E I L G R N C R F L O G P E . . . . . T D Q T V Q K I R D A I K . E Q R . D I T V Q L L N Y . . . T K S G R K F W N L F H L Q P M R D Q K . G E L Q Y F I G V L D G                 |
| Q765V9_ADICA/506-595  | I I F A S D S F L E L T E Y T R E E I I G R N C R F L O G Q D . . . . . T D Q T V Q K I R D A I R . E Q R . E I T V Q L L N Y . . . T K T G K R F W N L F H L Q P M R D Q K . G E L Q Y F I G V L D G                 |
| Q2QYX8_ORYSA/446-535  | I I F A S D S F L Q L T E Y N R E E I L G R N C R F L O G P E . . . . . T D R A T V R K I R D A I D . N Q A . E V T V Q L I N Y . . . T K S G K K F W N L F H L Q P M R D Q K . G D V Q Y F I G V L D G               |
| Q9SC66_ORYSA/427-519  | I I F A S D S F L Q L T E Y N R E E I L G R N C R F L O G P E . . . . . T D R A I V R K I R D A I D . N Q A . E V T V Q L I N Y . . . T K S G K K F W N L F H L Q P M R D Q K . G D V Q Y F I G V L D G               |
| AsLOV2                | I I F A S D S F L Q L T E Y S R E E I L G R N C R F L O G P E . . . . . T D R A T V R K I R D A I D . N Q T . E V T V Q L I N Y . . . T K S G K K F W N L F H L Q P M R D Q K . G D V Q Y F I G V L D G               |
| Q49003_AVESA/427-519  | I I F A S D S F L Q L T E Y S R E E I L G R N C R F L O G P E . . . . . T D R A T V R K I R D A I D . N Q T . E V T V Q L I N Y . . . T K S G K K F W N L F H L Q P M R D Q K . G D V Q Y F I G V L D G               |
| Q49004_AVESA/430-522  | I I F A S D S F L Q L T E Y S R E E I L G R N C R F L O G P E . . . . . T D R A T V R K I R D A I D . N Q T . E V T V Q L I N Y . . . T K S G K K F W N L F H L Q P M R D Q K . G D V Q Y F I G V L D G               |
| Q48547_MAIZE/415-507  | I I F A S D S F L R L T E Y C R E E I L G R N C R F L O G P E . . . . . T D R G T V K K I R D A I D . N Q T . E V T V Q L I N Y . . . T K S G K K F W N L F H L Q P M R D Q K . G D V Q Y F I G V L D G               |
| PHOT1_ARATH/489-578   | I I F A S D S F L L T E Y S R E E I L G R N C R F L O G P E . . . . . T D L T T V K K I R A I D . N Q T . E V T V Q L I N Y . . . T K S G K K F W N L F H L Q P M R D Q K . G E V Q Y F I G V L D G                   |
| Q5DW43_PHAVU/478-567  | I I F A S D S F L E L T E Y S R E E I L G R N C R F L O G P E . . . . . T D P A T V R K I R E A I D . N Q T . E V T V Q L I N Y . . . T K S G K K F W N L F H L Q P M R D Q K . G E V Q Y F I G V L D G               |
| Q1SQP8_MEDTR/152-241  | I I F A S D S F L E L T E Y S R E E I L G R N C R F L O G P E . . . . . T D P A T V R K I R E A I D . N Q T . E V T V Q L I N Y . . . T R T G K K F W N L F H L Q P M R D H K . G E V Q Y F I G V L D G               |
| Q8H935_VICFA/460-549  | I I F A S D S F L E L T E Y S R E E I L G R N C R F L O G P E . . . . . T D P A T V K K I R A I D . N Q T . E V T V Q L I N Y . . . T K T G K K F W N L F H L Q P M R D Q K . G E V Q Y F I G V L D G                 |
| Q5DW44_PHAVU/472-561  | I I F A S D S F L E L T E Y S R E E I L G R N C R F L O G P E . . . . . T D P A T V K I R E A I D . T Q T . D V T V Q L I N Y . . . T K T G K K F W N L F H L Q P M R D Q K . G E V Q Y F I G V L D G                 |
| Q9MB43_ADICA/581-670  | I I F A S D N F L E L T E Y S R E E I L G R N C R F L O G P D . . . . . T N R E T V K I R A I D . N E K . E V T V Q L L N Y . . . T K T G R F W N L F H L Q P M R D H K . G E L Q Y F T G V L D G                     |
| Q84K55_DRYFM/512-604  | I I F A S D Q F L E L T E Y S R E E V L G E N C R F L O G R D . . . . . T D L K A V Q L I R D A V K . E G R . D I T V Q L L N Y . . . T R G G R P F W N L F H L Q A M R D K . G N L Q Y F I G V Q E T                 |
| Q84K53_ONOSE/518-610  | I I F A S D Q F L E L T E Y S R E E V L G E N C R F L O G R D . . . . . T D R K A V Q L I R D A V E . E G R . D V T V Q L L N Y . . . T K G G R P F W N L F H L Q A M R D K K . G E V Q Y F I G V Q E T               |
| Q9ZWQ6_ADICA/943-1028 | I I F A S D R F L E L T E Y T R E E V L G N C R F L O G R G . . . . . T D R K A V Q L I R D A V K . E Q R . D V T V Q V L N Y . . . T K G G R A F W N L F H L Q V M R D E N . G D V Q Y F I G V Q E M                 |
| Q8LPE0_CHLRE/227-319  | I V F A S D A F L E L T G Y S R E E V L G N C R F L O G A G . . . . . T D R G T V D Q I R A A I K . E G S . E L T V R I L N Y . . . T K A G K A F W N M F T L A P M R D Q D . G H A R F F V G V D V D                 |
| Q8LPP9_CHLRE/227-319  | I V F A S D A F L E L T G Y S R E E V L G R N C R F L O G A G . . . . . T D R G T V D Q I R A A I K . E G S . E L T V R I L N Y . . . T K A G K A F W N M F T L A P M R D Q D . G H A R F F V G V D V D               |
| Q64511_ARATH/273-364  | I I Y A S D A F L T L T G Y K R Q E V L G O N C R F L S G V D . . . . . T D S S V L Y E M K E C I L . K G Q . S C T V Q I L N Y S . N R K D K S F W N L L H I S P V R N A S . G K T A Y F V G V E A                   |
| Q8W419_ARATH/273-362  | I I Y A S D A F L T L T G Y K R Q E V L G O N C R F L S G V D . . . . . T D S S V L Y E M K E C I L . K G Q . S C T V Q I L N Y . . . R K D K S F W N L L H I S P V R N A S . G K T A Y F V G V E A                   |
| PHOT2_ARATH/147-236   | I V Y A S S G F T M T G Y S S K E I V G R N C R F L O G P D . . . . . T D K N E V A K I R D C V K . N G K . S Y C G R L L N Y . . . K K D G T P F W N L L T V T P I K D D Q . G N T I K F I G M O V E V               |
| Q5DW42_PHAVU/210-299  | I M Y A S S G F F S M T G Y S S K E I I G R N C R F L O G P D . . . . . T D K N E V D K I R D A I R . N G R . S Y C G R L L N Y . . . K K N G T P F W N L L T V T P I K D D K . G N T I K F I G M O V E V             |
| Q9ST27_ORYSA/116-205  | I I Y A S E G F T M T G Y S P R E V V G R N C R F L O G P D . . . . . T D A E A V A K I R D A V K . H G R . S F C G R L L N Y . . . R K D G A P F W N L L T V T P I R D D N . G K V I K F I G M O V E V               |
| Q6BCU1_PHYPA/264-356  | I V Y A S A G F T M T G Y S A K E I I G H N C R F L O G P D . . . . . T D P A D V E K I R H A V K . N G K . N F C G R L L N Y . . . R K D G S T F W N L L T I T P I K D E N . D K V V K F I G M O V E V               |
| Q6BCU0_PHYPA/298-390  | I M Y A S A G F F S M T G Y S P K E I V I G R N C R F L O G P D . . . . . T D P M E V E K I R Q A V R . T G K . P F C G R L L N Y . . . R K D G T F W N L L T I T P I K D E N . D K V I K F I G M O V E V             |
| P93489_PEA/179-268    | I L Y A S A G F F K M T G Y T S K E V I G R N C R F L O G A D . . . . . T D P D D V A R I R E A L E . G G K . S F C G R L L N Y . . . K K D G T P F W N L L T I S P I K D D E . G N V L K L I G M L V E V             |
| Q8H934_VICFA/174-263  | I L Y A S A G F F K M T G Y T S K E V I G R N C R F L O G A D . . . . . T D P N D V A R I R E A L E . G G K . S F C G R L L N Y . . . K K D G T P F W N L L T I S P I K D D D . G N V L K L I G M L V E V             |
| Q5DW43_PHAVU/182-274  | I L Y A S A G F F K M T G Y T S K E V I G R N C R F L O G A E . . . . . T D C G D V A K I R E A L E . A G K . I Y C G R L L N Y . . . K K D G T P F W N L L T I T P I K D E D . G K V L K F I G M L V E V             |
| Q8H935_VICFA/175-267  | I M Y A S A G F F S M T G Y T S K E V I G R N C R F M O G A D . . . . . T D P N D V A K I R E A L A . A G T . S Y C G R L L N Y . . . K K D G T T F W N L L T I A P I K D E H . G K I L K L I G M O V E V             |
| Q6WD26_PEA/178-270    | I M Y A S A G F F N M T G Y T S K E V I G R N C R F M O G A D . . . . . T D P N D V A K I R E A V A . A G T . S Y C G R L L N Y . . . K K D G T T F W N L L T I A P I K D E H . G K I L K L I G M O V E V             |
| Q5DW44_PHAVU/192-284  | I M Y A S A G F F K M T G Y T S K E V I G R N C R F M O G A D . . . . . T D P D D V A K I R E A L Q . T G Q . T Y C G R L L N Y . . . K K D G T P F W N L L T I A P I K D H D . G R V L K F I G M O V E V             |
| Q765V9_ADICA/235-327  | I L Y A S A G F F K M T G Y S S K E V I G R N C R F L O G A D . . . . . T D P D D V E R I R E S L A . E G K . N Y C G R L L N Y . . . K K D G T A F W N L L T I A P I K D E E . G N V L K F I G M O V E V             |
| Q6BCT8_PHYPA/328-420  | I L Y A S A G F F N M T G Y T P K E V I G R N C R F L O G A G . . . . . T D N A D V A R I R E A L K . E G K . S F C G R L L N Y . . . K K D G S A F W N L L T I T P I K D D D . G K V L K F I G M O V E V             |
| Q6BCT7_PHYPA/362-454  | I L Y A S A G F F N M T G Y T P K E V I G R N C R F L O G P G . . . . . T D P E D V T R I D A L K . E G R . S F C G R L L N Y . . . K K D G S A F W N L L T I T P I K D D D . G K V L K F I G M O V E V               |
| Q49004_AVESA/153-245  | I M Y A S A G F F N M T G Y T S K E V V G R N C R F L O G S G . . . . . T D P A E I A K I R Q A L A . D G S . N Y C G R V L N Y . . . K K D G T A F W N L L T I A P I K D E E . G R V L K F I G M O V E V             |
| Q49003_AVESA/150-242  | I M Y A S A G F F N M T G Y T S K E V V G R N C R F L O G S G . . . . . T D P A E I A K I R Q A L A . N G S . N Y C G R V L N Y . . . K K D G T A F W N L L T I A P I K D E E . G R V L K F I G M O V E V             |
| Q2QYX8_ORYSA/169-261  | I M Y A S A G F F N M T G Y T S K E V V G R N C R F L O G S G . . . . . T D P H E I D K I R Q S L A . N G S . N Y C G R I L N Y . . . K K D G T P F W N L L T I A P I K D E D . G R L L K F I G M O V E V             |
| Q2RBR1_ORYSA/169-261  | I M Y A S A G F F N M T G Y T S K E V V G R N C R F L O G S G . . . . . T D P H E I D K I R Q S L A . N G S . N Y C G R I L N Y . . . K K D G T P F W N L L T I A P I K D E D . G R L L K F I G M O V E V             |
| Q9ST26_ORYSA/150-242  | I M Y A S A G F F N M T G Y T S K E V V G R N C R F L O G S G . . . . . T D P H E I D K I R Q S L A . N G S . N Y C G R I L N Y . . . K K D G T P F W N L L T I A P I K D E D . G R L L K F I G M O V E V             |
| Q9SC66_ORYSA/150-242  | I M Y A S A G F F N M T G Y T S K E V V G R N C R F L O G S G . . . . . T D P H E I D K I R Q A L A . N G S . N Y C G R I L N Y . . . K K D G T P F W N L L T I A P I K D E D . G R L L K F I G M O V E V             |
| Q48547_MAIZE/141-233  | I L Y A S A G F F N M T G Y T S S N E V V G R N C R F L O G S G . . . . . T D P V E I S K I R Q A L A . A G S . N Y C G R I L N Y . . . K K D G T P F W N L L T V A P I K D E D . G R V L K F I G M O V E V           |
| PHOT1_ARATH/211-303   | I M Y A S A G F F N M T G Y T S K E V V G R N C R F L O G S G . . . . . T D A D E L A K I R E T L A . A G N . N Y C G R I L N Y . . . K K D G T S F W N L L T I A P I K D E S . G R V L K F I G M O V E V             |
| Q56Y57_ARATH/211-303  | I M Y A S A G F F N M T G Y T S K E V V G R N C R F L O G S G . . . . . T D A D E L A K I R E T L A . A G N . N Y C G R I L N Y . . . K K D G T S F W N L L T I A P I K D E S . G R V L K F I G M O V E V             |
| Q9MB43_ADICA/293-385  | I M Y A S A G F F K M T G Y T S K E V I G R N C R F L O G K E . . . . . T D P E E I D R I R E C L A . K G S . G Y C G R L L N Y . . . K K D G S A F W N L L T I S P I K D V D . G S V L K F I G M O V E V             |
| Q9ZWQ6_ADICA/689-782  | I I Y A S T G F F N L T G Y T S R E V I G G N C R F L O G P D . . . . . T N P A D V A S I R E A L A . Q G T G T F C G R L L N Y . . . R K D G S S F W N L L T I A P I K D D L . G S I V K L I G V L E V               |
| Q84K53_ONOSE/249-343  | I I Y A S T G F F N L T G Y T S R E V I G G N C R F L O G P E . . . . . T N P A V I D S I R E A L V P Q G T G T F C G R L L N Y . . . R K D G S S F W N L L T I A P I K D D S . G T I V N L I G V L E V               |
| Q84K55_DRYFM/244-338  | I I F A S T G F F N L T G Y T S R E V I G G N C R F L O G P D . . . . . T N P E D V A S I R D A V P P R G T G T F C G R L L N Y . . . R K D G S N F W N L L T I A P I K D D T . G T I V K L V G V L E V               |
| Q401Q4_MOUSE/48-137   | I V F A S E G F Y E M T G Y G P E E V I G N C R F L O G E G . . . . . T S R D E V T R L K Q C L L V . E G Q . P F C G R L L N Y . . . R K D G T P F W N L L T V S P V R S A T . G R V V K F I G M O V E V             |
| Q401Q5_MOUSE/61-145   | V M F A S E G F Y R M T G Y S A K E V I G N C R F L O G P E . . . . . T D R S E V E K L Q A L L . D G Q . S W C G R L L N Y . . . R K D G S S F W N L L T V S P V K D D S . G R V V K F I G M O V E V                 |
| Q8LPP9_CHLRE/34-126   | L V Y A S E G F Y A M T G Y G P D E V L G H N C R F L O G E G . . . . . T D P K E V Q K I R D A I K . K G E . A C S V R L L N Y . . . R K D G T P F W N L L T V T P I K T P D . G R V S K F V G V D V D               |
| Q8LPE0_CHLRE/34-126   | L V Y A S E G F Y A M T G Y G P D E V L G H N C R F L O G E G . . . . . T D P K E V Q K I R D A I K . K G E . A C S V R L L N Y . . . R K D G T P F W N L L T V T P I K T P D . G R V S K F V G V D V D               |
| Q7USG5_RHOBA/987-1101 | I S F V N K G F T D M T G F S E Q E I L G R N C R F L O G E H . . . . . T D N E T V L R I R R A L G . R G E . S V R E L I K N Y . . . R K N G E P F W N D L Y I T P V H D E N . G I L T H F V G V D N D V             |

F494 ↑ Q513 ↑

Supporting Fig. 3  
Nash et al.



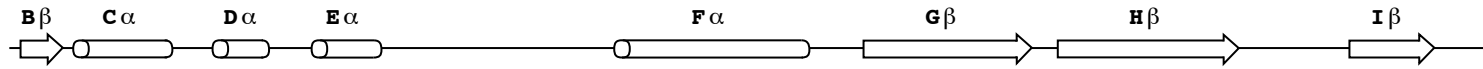

Q40XK1\_KINRA/196-283  
 Q2N9L9\_9SPHN/41-155  
 Q2G5UO\_NOVAD/50-163  
 EL368  
 Q2NCA3\_9SPHN/62-154  
 Q4ZSY3\_PSEU2/22-136  
 Q881J7\_PSEIM/22-136  
 Q48IV1\_PSEL4/20-112  
 Q35E64\_9BRAD/52-144  
 Q3BRX8\_XANC5/53-145  
 Q8PJH6\_XANAC/53-145  
 Q2P134\_XANOM/53-145  
 Q5GY20\_XANOR/53-145  
 Q8P827\_XANCP/53-145  
 Q4UW16\_XANC8/53-145  
 Q1NI33\_9SPHN/78-170  
 Q2YKK7\_BRUA2/20-112  
 Q57Y7\_BRHIZ/15-107  
 Q8FW73\_BRUSU/20-112  
 Q8YC53\_BRUME/46-138  
 BML0V  
 Q1M667\_RHILV/33-146  
 Q9ABE3\_CAUCR/128-220  
 Q1YFS4\_9RHIZ/62-154  
 Q3VF27\_9SPHN/26-115  
 Q1N7J1\_9SPHN/51-164  
 EL222  
 Q2G8Z7\_NOVAD/53-145  
 Q8ESN8\_OCRH/7-124  
 PHOT\_BACSU/14-126  
 Q3J6W8\_NITOC/42-134  
 Q2Y837\_NITUM/39-131  
 Q3ONSO\_THIDN/111-226  
 Q2CIF5\_9RHOB/15-130  
 Q1YEU2\_9RHIZ/42-131  
 Q2NB77\_9SPHN/34-121  
 EL346  
 Q1N482\_9GAMM/290-403  
 Q3ITW5\_NATPD/146-260  
 Q5V3S3\_HALMA/280-372  
 Q5V5P7\_HALMA/296-388  
 Q3IM51\_NATPD/130-244  
 Q5UW17\_HALMA/1483-1575  
 Q40X75\_KINRA/448-562  
 Q55576\_SYNY3/296-413  
 Q3WZU4\_9ACTN/24-138  
 Q8DJE3\_SYNEL/317-431  
 Q4BW45\_CROWT/189-281  
 Q3MED3\_ANAVT/466-558  
 Q8YT51\_ANASP/463-555  
 Q8YSB9\_ANASP/202-316  
 Q3M6B3\_ANAVT/202-316  
 Q3INI4\_SYNP7/395-487  
 Q5N5M8\_SYNP6/395-487  
 Q3GGZ4\_9GAMM/678-789  
 Q35YY2\_9GAMM/659-770  
 Q2WNU6\_9GAMM/666-777  
 Q8XT61\_RALSO/624-738  
 Q67UX0\_ORYSA/68-162  
 ZTL  
 LKP2  
 FKF1  
 consensus>89

```

.VWTNPAFERVTVYGR.EVVLGQNCRFLOGPG.....TDREAVARIRRALE.TGD.TVTELLLNY...RKDGTAFFWNEVVISFVHADAD.GRLTHFVGVQSDV
IVFCNAAFERLTYGEEKDITGRNCRFLQGAR.....TDSEQVARIRDALA..KEEVAVVELLNY...RKDGSTFFWNNALHLGFIYDES.GKLYYFFRQOWDV
IVFANRAFRLHLYGYDEHEVVRNCRFLQGP.....TDPAAVARIKAALE..REDVIVVELLNY...RKDGTAFFWNNALHLGFIYDAD.GRLIYFFRQOWDV
VVVYNQAFLLDTGYAREEIVGRNCRFLQGAD.....TDPEQVRKLRREGIA..AERYTVVDLLNY...RKDGIFPFWNAVHVGFIYGED.GTLQYFYGSOWDI
VVVYNQAFLLDTGYAREEIVGRNCRFLQGAD.....TDPEQVRKLRREGIA..AERYTVVDLLNY...RKDGIFPFWNAVHVGFIYGED.GTLQYFYGSOWDI
IIFANRAFLMTGYASEEILGSCNCRFLQGPD.....TDRTAVQSIIRDAID..QRVDISTEILNY...RKDGSSFFWNALFISPVYNDAGELIYFFASOLDI
IIFSNRAFLMTGYTAEELGTNCRFLQGPD.....TDPAVQVSIRDAIA..QRNDISAEIINNY...RKDGSSFFWNALFISPVYNDAGDLIYFFASOLDI
IIFSNRAFLMTGYSSSEIITNCRFLQGPE.....TDRAVVQSIIRDAID..ERVDISTEILNY...RKDGSTFFWNNALFISPVYNDAGDLIYFFASOLDI
ILFANRAFLMTGYELNEIVGTNCRFLQGPD.....TDQETIAAIRSAIA..SRSDIAVEILNY...RKNAGAFWNALFISPVYNRAGELVYFFRQOLDV
IVFANRAFLMTGYAADVIVGNCRFLQGPD.....TDPASISDVRSIE..SRSEFATEVLNY...RKDGSSFFWNALFISPVFDDK.GNLVYFFRQOLDV
IVFANRAFLMTGYAADVIVGNCRFLQGPE.....TDPASISDVRSIE..SRSEFATEVLNY...RKDGSSFFWNALFISPVFDDK.GNLVYFFRQOLDV
IVFANRAFLMTGYSAEIVGNCRFLQGPE.....TDPASISDVRSIE..TRSEFATEVLNY...RKDGSSFFWNALFISPVFDDH.GNLVYFFRQOLDV
IVFANRAFLMTGYSAEIVGNCRFLQGPE.....TDPASISDVRSIE..TRSEFATEVLNY...RKDGSSFFWNALFISPVFDDH.GNLVYFFRQOLDV
IVFANRAFLMTGYAADVIVGNCRFLQGPE.....TDRQAVADVREID..NRSEFATEVLNY...RKDGSTFFWNNALFISPVFDDT.GKLYYFFRQOLDV
IVFANRAFLMTGYAADVIVGNCRFLQGPE.....TDRQAVADVREID..NRSEFATEVLNY...RKDGSTFFWNNALFISPVFDDT.GKLYYFFRQOLDV
IVFANKAFLDLTYGEESEIVGRNCRFLQGAD.....TDRGAVSDLREAVK..HREATSLIENNY...KRDGTAFWNNALFISPVFDDH.GELIYFFASOLDV
IVFANPAFLKLTGYEADVVMGRNCRFLQGHG.....TDPAHVRAIKSAIA..AEKPIDIDIIINNY...KKSGEAFWNNALFISPVHNNAGRLQHFVSSOLDV
IVFANPAFLKLTGYEADVVMGRNCRFLQGHG.....TDPAHVRAIKSAIA..AEKPIDIDIIINNY...KKSGEAFWNNALFISPVHNNAGRLQHFVSSOLDV
IVFANPAFLKLTGYEADVVMGRNCRFLQGHG.....TDPAHVRAIKSAIA..AEKPIDIDIIINNY...KKSGEAFWNNALFISPVHNNAGRLQHFVSSOLDV
IVFANPAFLKLTGYEADVVMGRNCRFLQGHG.....TDPAHVRAIKSAIA..AEKPIDIDIIINNY...KKSGEAFWNNALFISPVHNNAGRLQHFVSSOLDV
IVFANPAFLKLTGYEADVVMGRNCRFLQGHG.....TDPAHVRAIKSAIA..AEKPIDIDIIINNY...KKSGEAFWNNALFISPVHNNAGRLQHFVSSOLDV
IVLANKAFLLELTGYPAQEVLRNCRFLQGPA.....TSPVAVAEIRAAIA..GEREVSVIELNY...KKSGEQFVNNALFISPVHGGD.GKLYYFFRQOLDM
IIFANDAFRLTYGARDVIVGNCRFLQGPD.....TDPKAIQAVRDALA..AGEDVAVDLLNY...RKDGSSFFWNALFISPVFRGDE.GDLVYFFRQOLDV
IIFANDAFQDLTGYDRDELIGNCRFLQGPD.....TDPTVEDLRLQAIA..RKEPVAVQLRNY...RKDGSAFVNNALFISPVFRGDE.GDVQFFVSSOLDM
IVECNDAFALTYGYRPEELIGNCRFLQGPD.....TEPELSAELRRAIR..DRAALVVEILNY...KKGTRFRNVALVSPVLFSPD.GELEYFLVSSOMEV
VIECNDAFLALTYGYRREIVGNCRFLMRGAG.....TEPELTGQIRAAIS..DRRPILVEILNY...KKGGAFFRNVAVLIAPVIFDSD.GTLKYFLVSSLMEV
LIAINQAFDLDTYGYSEECVGRNCRFLRAGSG.....TEPWLTDKIRQGVV..EHKPVLVIEILNY...KKGTPFRNAVLIAPVIFDSD.GELEYFLVSSOMEV
IIACNDAFVLELTGYAREEIVGNCRFLRAGSG.....TEDDKARILRDGIV..RKQPVMVEIVNY...KKGTRFRNAVLIAPVIFDAD.DEVVEYFLVSSOVI
IVIANQAFLELTGYEEHEIIGKNCRFLQGGK.....TDNISIKQLRDAIQ..NKEPTIQIINNY...KKGDTGFVNNELSDHMMWDEG.EGKYFFVGVQKDI
IVVYNQGFVQMTGYETEELIGKNCRFLQGGK.....TDPAEVDNIRTLAQ..NKEPTVQIQINNY...KKGDTGFVNNELSDHMMWDEG.EGKYFFVGVQKDI
LIYVNEAFEKITGYKKEELIGKNCRFLQGND.....RDQEGSRVREAIQ..KRPVIEVDLKNY...KKNGEFLFYNNHLNIPVFDQE.GNLLYFLVSSOYDI
LVYANKAFADMTGYTQETIIGKNCRFLQGTD.....RQEQRSEQIRTAIT..NKEPVEVTLRNY...RKNGEFLFYNNHLNIPVFDQE.GNLLYFLVSSOYDI
IIYVNNSECELTFRYKYEIVGKNCRFLHSSD.....KEQKSLENIREAIS..TKQSVVKIRNY...TKDGNKLYEDIETISPVFDEKEKLVYFLVSSYKDL
IVYVNRFAEELTYGVSHMAVGNCRFLQGGK.....TRKADVARLREAVA..TGEDVSLIENNY...RANGEPFNALLIPVLDSETGEATFLVGLGOREI
IVYANRAFEKITGYRSADVIVGNCRFLQGGK.....TDPQAVRQLQAQAVR..NCEEVVIVDNY...RSDGTRFLNRLHISPVLYDER.HLQCFVGVQRDM
..YVNRFAEQMTGYRSRSVIVGNCRFLQGGK.....TDPGAVERLAKAIR..NCEEVVETIYNY...RADGEGFWNNHLLMGLPQEDQE.KCRYVFGIQRDM
LIYVNRFAEQMTGYRSRSVIVGNCRFLQGGK.....TDPGAVERLAKAIR..NCEEVVETIYNY...RADGEGFWNNHLLMGLPQEDQE.KCRYVFGIQRDM
LIYANRFFYKLTGYSESEIVGKNCRFLQGRN.....TNREARLIIRDAIN..TRRKIVLELLNY...KKGTEFFWKLFLSPVIFKD..GECRAYVGIQRDI
LVYINEAFERLTYGERHEVLRNCRFLQGED.....TNPEAVATIRQAVD..DRRPVSVELLNY...RKDGEPFVNNALFISPVIRDD.GRVTHLVGFTDI
ISYANRQFLELTGYTESVVRGNCRFLQGE.....TEAEPVDAMRAID..ADEPVSVELRNY...RKDGTFMFWNNALFISPVIRDD.GTVVNVGFRDI
LIYANDHYRELTYGYSLELLGKNCRFLQGEN.....TDPEPVDALRDAID..AGEQVSVELRNY...RKDGTEFFWNNALFISPVIRDD.GTVVNVGFRDI
ITYVNNRFFVEITGYARAIVLGNCRFLQGEA.....TRDEPIAQLRAALE..RGETATVELRNY...RKDGTFMFWNNALFISPVIRDD.GTVVNVGFRDI
LVYVNDGFVDQTYGYSREELGNCRFLQRDD.....RDQSAIGLRLKAIA..SEEPSVIVELRNY...KKGTEFFWNNALFISPVIRDD.GTLNLIYGIQRDV
LVYVNRFAEELTYGRSEELGNCRFLQGGAD.....TDHDAIGLRLKAIA..SEEPSVIVELRNY...KKGTEFFWNNALFISPVIRDD.GTLNLIYGIQRDV
VVYANQGFETITGFNREIVGQNCRFLLNEDRQGEQ.....NKQLEKLRTAIA..HGQCEVVLKNY...RKDGASFFWNNALFISPVYNDAGELVYFFRQOLDV
IIYVNPFAFERITGYSRREIVGNCRFLQREDR.GQ.....AELEVLRQAMA..ERRDCRVVLRNY...RRDGRMFVNNALFISPVYNDAGELVYFFRQOLDV
VIYVNPFAFERITGYSRREIVGNCRFLQREDR.GQ.....AELEVLRQAMA..ERRDCRVVLRNY...RRDGRMFVNNALFISPVYNDAGELVYFFRQOLDV
IIYVNPFAFERITGYSLQEVTVGNCRFLQGSDDQPP.....GATAIRNAIK..KGQSCRVVLRNY...RKNQQLFWNNALFISPVYNEF.GEITHYVGIQRDV
VIYVNSAFEQITGYKATEIVGNCRFLQGNDDTQP.....ELEQIRDCLO..KGESCHVTLRNY...RKDGSLFWNNALFISPVYNDAGELVYFFRQOLDV
VIYVNSAFEQITGYKATEIVGNCRFLQGNDDTQP.....ELEQIRDCLO..KGESCHVTLRNY...RKDGSLFWNNALFISPVYNDAGELVYFFRQOLDV
VIYVNSAFEQITGYKATEIVGNCRFLQGNDDTQP.....ELEQIRDCLO..KGESCHVTLRNY...RKDGSLFWNNALFISPVYNDAGELVYFFRQOLDV
IIYVNPFAFERITGYSAEIVGNCRFLQANETDQL.....SLSELRSALQ..EKKECHVVIKFN...RKDGTEFFWNNALFISPVFDDC.EQLTHFVGIQRDI
IIYVNPFAFERITGYSEAMLGNCRFLQGNERSL.....QEBEIHRLGLS..QAENVHVIRNF...RKDGQPFVNDLYSIPVFNAG.GNVTHFVGIQRDI
VIYVNPFAFERITGYSEAMLGNCRFLQGNERSL.....QEBEIHRLGLS..QAENVHVIRNF...RKDGQPFVNDLYSIPVFNAG.GNVTHFVGIQRDI
IVDVNSAFTQITGYSRDEIIGKNCRSLEAERT.....DRSIDAQRVRAALD..QTGFVQGEVWDR...HKGDFDFPKWLMMSVVRDET.GAISHYVGIQRDI
IVDVNSAFTQITGYSRDEIIGKNCRSLEAERT.....DRSIDAQRVRAALD..QTGFVQGEVWDR...HKGDFDFPKWLMMSVVRDET.GAISHYVGIQRDI
IVDVNTAFSQTGYSRDEIIGKNCRFLQAKRT.....DKSIDPQVRAALE..QTGFVQGEVWDR...HKGDFDFPKWLMMSVVRDES.GAVSHYVGIQRDI
LVYVNPGFERITGYRAEIVLGNCRFLHSSPE.....GQPALNEVRAALR..DASEVTVLLRNF...RKDGHAFVNNALFISPVVRSDE.GAVTHYVGIQRDV
IIYVNRGFEDATGYRAEIVLGNCRFLQCRGPFAKRRHPL..VDTTVNTRDIRRCLB..EGTVFQGDLLNF...RKDGSPFMALNKLQTFPIYGGD.ETITHYVGMQFFN
IIYVNTVFEMVTVGYRAEIVLGNCRFLQCRGPFQAKRRHPL..VDSMVVSEIRKCID..EGIEFQGEVWDR...HKGDFDFPKWLMMSVVRDET.GAISHYVGIQRDI
IIYVNTVFEMVTVGYRAEIVLGNCRFLQCRGPFQAKRRHPL..VDSMVVSEIRKCID..EGIEFQGEVWDR...HKGDFDFPKWLMMSVVRDET.GAISHYVGIQRDI
LIYVNRVFEVFTGYRADEIVLGNCRFLQYRDPRAQRHPL..VDPVVVSEIRRCLE..EGIEFQGEVWDR...HKGDFDFPKWLMMSVVRDET.GAISHYVGIQRDI

```

Supporting Fig. 3, cont.  
 Nash et al.

F494

Q513
